# Supplementary material for: A TiS2 nanosheet enhanced fluorescence polarization biosensor for ultra-sensitive detection of biomolecules
Source: Royal Society of Chemistry journal article supplement (doi:10.1039/c6nr00946h), 2016-01-01
Supplement: c6nr00946h1.pdf [file c6nr00946h1.pdf]

## Electronic Supplementary Information

### **A TiS<sub>2</sub> nanosheet-enhanced fluorescence polarization biosensor for ultra-sensitive detection of biomolecules**

Xiang Li,<sup>a</sup> Xuelian Ding,<sup>b</sup> Yongfang Li,<sup>c</sup> Linsong Wang<sup>c</sup> and Jing Fan<sup>\*a</sup>

<sup>a</sup> School of Environment, Henan Key Laboratory for Environmental Pollution Control, Key Laboratory for Yellow River and Huai River Water Environment and Pollution Control, Ministry of Education, Henan Normal University, Xinxiang, Henan 453007, P. R. China

<sup>b</sup> Department of Chemistry, Sanquan Medical College, Xinxiang Medical University, Xinxiang, Henan 453003, P. R. China

<sup>c</sup> Life Science College, Henan Normal University, Xinxiang, Henan, 453002, P. R. China

\*Address correspondence to Jing Fan, School of Environment, Henan Normal University, Xinxiang, Henan 453007, P. R. China

Tel: +86-373-3325719

Fax: +86-373-3325719

E-mail: fanjing@htu.cn

Table S1. List of the oligonucleotides used

| oligonucleotide | Sequences (from 5' to 3')                                       |
|-----------------|-----------------------------------------------------------------|
| Probe 1         | 5'-TAT CTA GTT GAG CTG TCT AGT C-folate-3'                      |
| Probe 2         | 5'-G ACT AGA CGT TGA ↓ AGG ATA-FAM-3'                           |
| Probe 3         | 5'-TAT CTA GTT GAG CTG TCT AGT <u>CGG TTG GTG TGG TTG G</u> -3' |
| Probe 4         | 5'-G ACT AGA CGT TGA ↓ AGG ATA -3'                              |
| 3-F             | 5'-ATA-FAM-3'                                                   |
| 6-F             | 5'-AGG ATA-FAM-3'                                               |
| 10-F            | 5'-T TGA AGG ATA-FAM-3'                                         |
| 15-F            | 5'-AGA CGT TGA AGG ATA-FAM-3'                                   |
| 19-F            | 5'-G ACT AGA CGT TGA AGG ATA-FAM-3'                             |
| 25-F            | 5'- C GTA CTG ACT AGA CGT TGA AGG ATA-FAM-3'                    |

Table S2. Comparison of fluorescence methods for the determination of FR

| technique and method                                                                        | LOD; linear range                  | ref        |
|---------------------------------------------------------------------------------------------|------------------------------------|------------|
| Electrochemical                                                                             | 0.3 ng/mL; 1.0-20.0 ng/mL          | S1         |
| Electrochemical, Nicking endonuclease                                                       | 0.19 ng/mL ; 0.3-15 ng/mL          | S2         |
| Electrochemical, single-walled carbon nanotubes                                             | 0.114 ng/mL (3 pM); 0.01-1 nM      | S3         |
| Electrochemical                                                                             | 0.114 ng/mL (3 pM); 0.01-500 nM,   | S4         |
| Electrochemical; Hybridization chain reaction                                               | 0.003 ng/mL , 0.01-100 ng/mL       | S5         |
| Colorimetry; AuNPs                                                                          | 0.33 ng/mL, 0.5- 50 ng/mL          | S6         |
| Colorimetry , Hemin/G-quadruplex DNAzyme                                                    | 0.19 ng/mL (5 pM), 0-100 pM        | S7         |
| Colorimetry; Gold nanoparticle , Exonuclease III                                            | 0.0019 ng/mL (50 fM) , 0.1-10 pM   | S8         |
| Fluorescence; Graphene oxide                                                                | 0.77 ng/mL, 1-800 ng/mL            | S9         |
| Fluorescence; Rolling circle amplification;<br>Exonuclease III                              | 0.030 ng/mL (0.8 pM), 1 pM to 1 nM | S10        |
| Fluorescence polarization; TiS <sub>2</sub> nanosheet, Zn <sup>2+</sup><br>depended-DNAzyme | 0.003 ng/mL; 0.01-20 ng/mL         | this study |

It should be noted that 1 pM  $\approx$  38 pg/mL

Table S3. Comparison of the amplification method developed in this work with the traditional ELISA kit approach for the detection of FR in the serum samples.

| Sample <sup>a</sup> | This work (ng/mL) <sup>b</sup> | RSD (% , n=3) | ELISA (ng/mL) <sup>b</sup> | RSD (% , n=3) |
|---------------------|--------------------------------|---------------|----------------------------|---------------|
| 1                   | 1.23                           | 2.5           | 1.27                       | 2.6           |
| 2                   | 1.35                           | 2.3           | 1.32                       | 2.4           |
| 3                   | 1.28                           | 2.2           | 1.29                       | 2.1           |
| 4                   | 0.075                          | 3.2           | 0.080                      | 3.0           |
| 5                   | 0.086                          | 2.8           | 0.089                      | 3.1           |
| 6                   | 0.077                          | 3.1           | 0.070                      | 2.9           |

<sup>a</sup> Samples 1, 2 and 3 were from advanced ovarian cancer patients; samples 4, 5 and 6 were from healthy women.

<sup>b</sup> Each sample was analyzed in triplicate, and the results were the average values

Table S4. Sensing platforms for the detection of Tb

| <b>Technique and method</b>                                                                                  | <b>LOD; linear range</b>  | <b>real sample</b> | <b>ref</b> |
|--------------------------------------------------------------------------------------------------------------|---------------------------|--------------------|------------|
| Fluorescence; Gold nanoparticle                                                                              | 2.5 nM; 5.0- 2500 nM      | No                 | S11        |
| Fluorescence; Graphene oxide nanosheet                                                                       | 2 nM; 0-100 nM            | No                 | S12        |
| Fluorescence; Carbon nanotube                                                                                | 1.8 nM; 4.0-150 nM        | No                 | S13        |
| Fluorescence; MoS <sub>2</sub> nanosheet                                                                     | 300 pM; 0-100 nM          | No                 | S14        |
| Fluorescence; Exo III- amplification<br>molecular aptamer beacon                                             | 89 pM; 0-2 nM             | No                 | S15        |
| Fluorescence; Nicking Enzyme -amplification<br>molecular aptamer beacon                                      | 100 pM; 0-1 nM            | human serum        | S16        |
| Fluorescence polarization                                                                                    | 100 pM; 0.1–2 nM          | human serum        | S17        |
| Fluorescence polarization; Nicking Enzyme -<br>amplification; Graphene oxide nanosheet                       | 1 fM; 2 fM–200 nM         | human plasma       | s18        |
| Fluorescence polarization; Zn <sup>2+</sup> -depedent -<br>DNAzyme amplification; TiS <sub>2</sub> nanosheet | 0.01 pM; 0.05 pM-<br>50nM | human plasma       | this study |

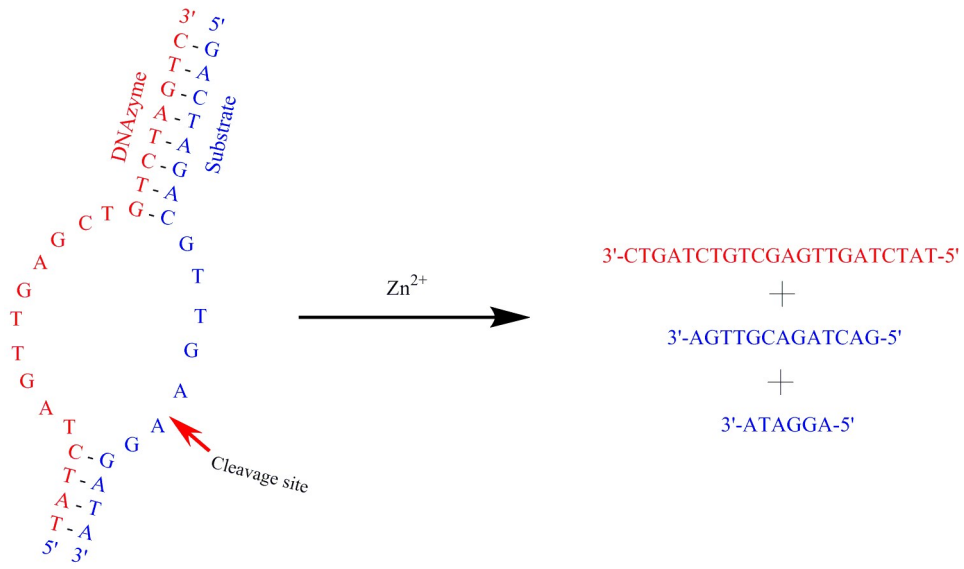

Scheme S1. The structure of  $Zn^{2+}$ -depended self-hydrolyzing deoxyribozymes.

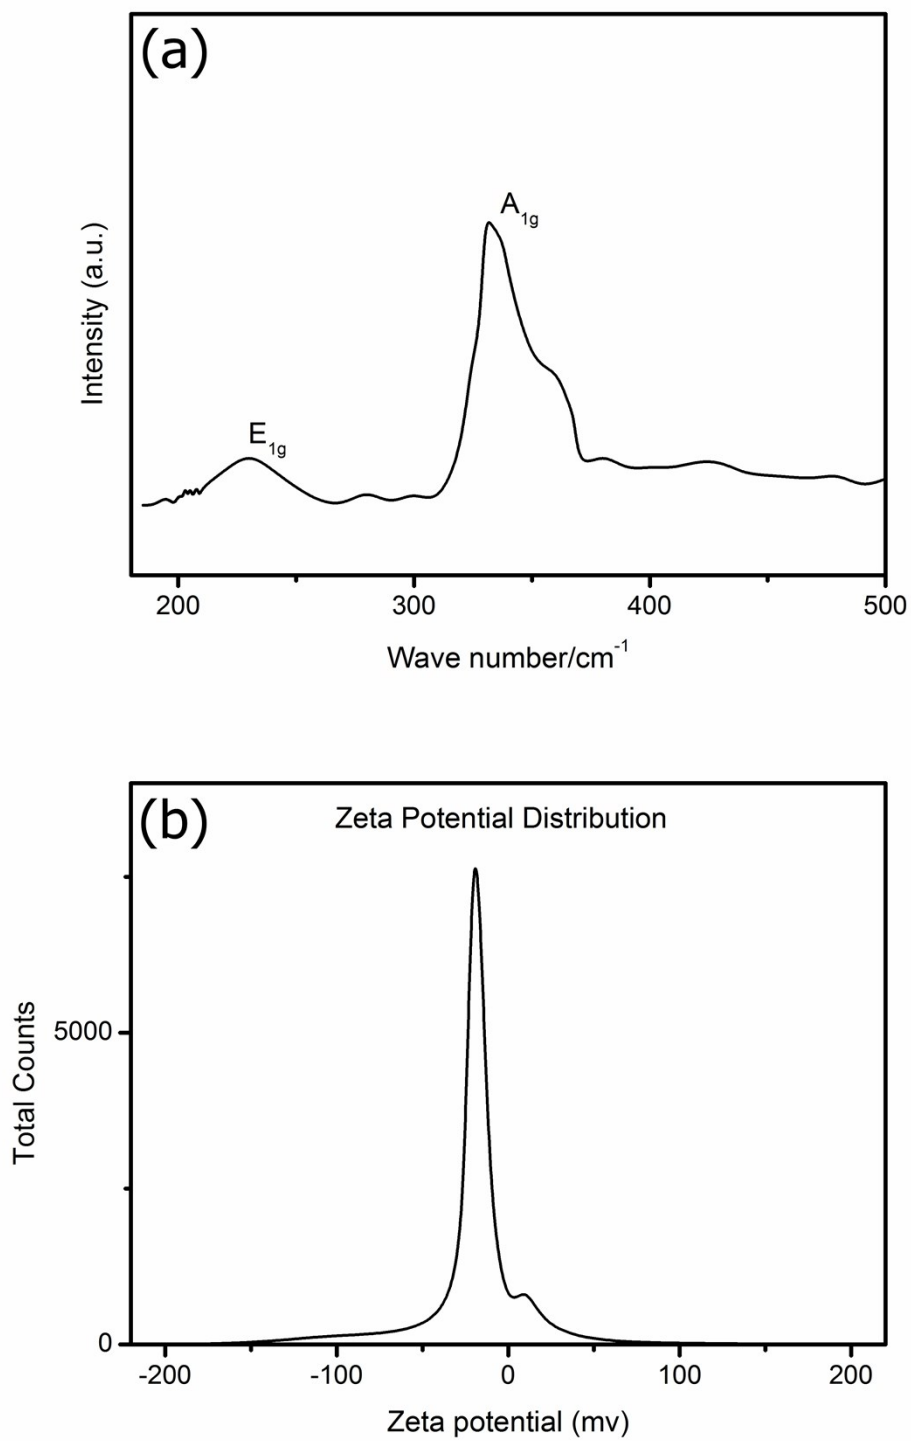

Fig. S1. (a), Raman spectra of the as-prepared TiS<sub>2</sub> nanosheets; (b), values of the zeta potential for the as-prepared TiS<sub>2</sub> nanosheets.

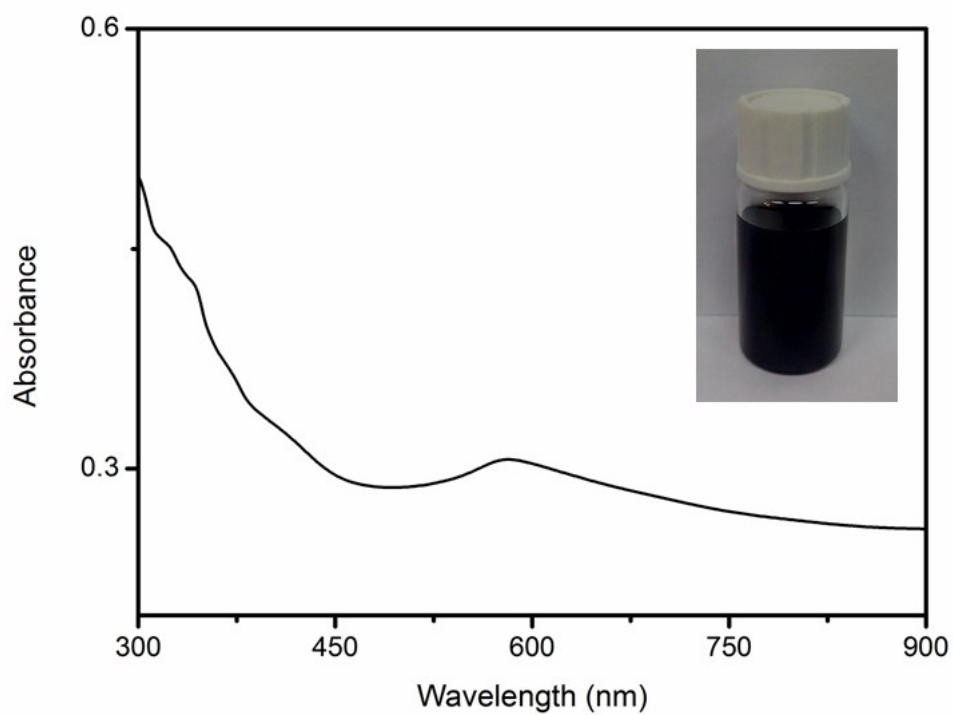

Fig.S2. UV-vis spectrum of the as-prepared layered TiS<sub>2</sub> nanosheet: Inset, the photograph of the TiS<sub>2</sub> nanosheet in aqueous solution.



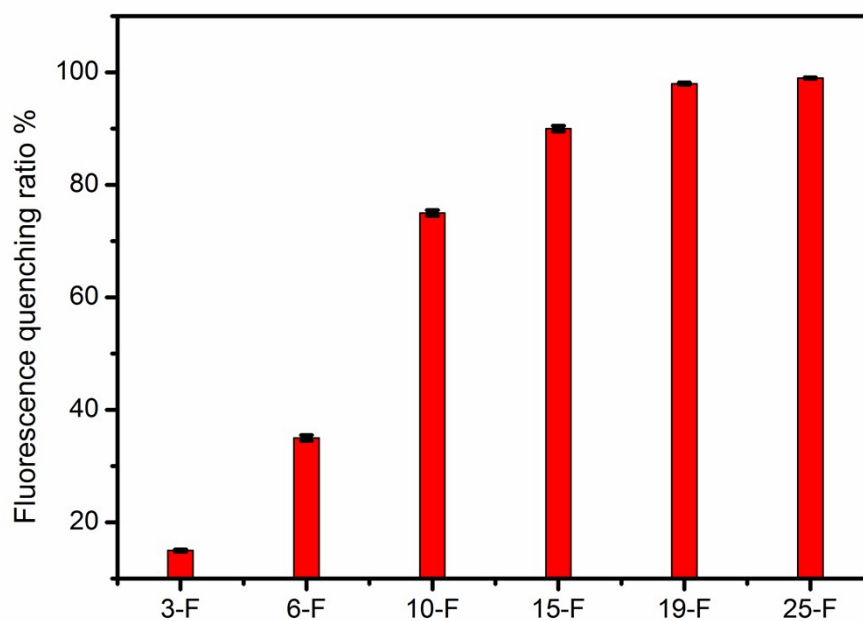

Fig. S3. Comparison of the fluorescence quenching ratio of TiS<sub>2</sub> nanosheet to ssDNA with different lengths: the concentration of TiS<sub>2</sub> nanosheet was fixed at 25 µg/mL, and the 3-F, 6-F, 10-F, 15-F, 19-F and 25-F indicate FAM-labeled ssDNA containing 3, 6, 10, 15, 19 and 25 bases, respectively.

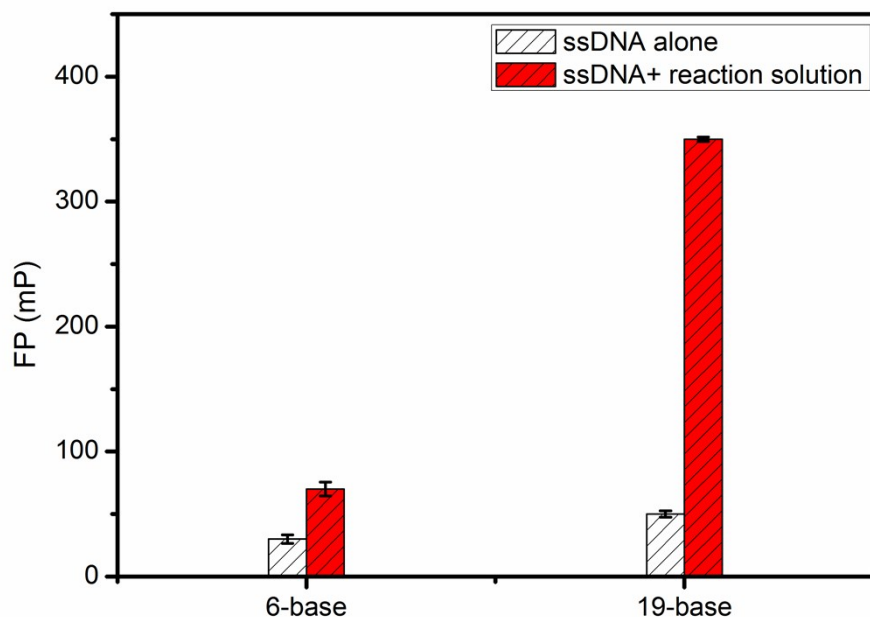

Fig. S4. The changes in the fluorescence polarization value of 6-base FAM-ssDNA (6-F) and 19-base FAM-ssDNA (19-F) with or without addition of the reaction solution.

In order to verify whether the low fluorescence polarization value may be caused by incomplete adsorption of the fragments, additional control experiments have been performed. For this purpose, a new substrate strand is designed as probe 4. Compared with probe 2, probe 4 has the same base length but has no fluorophore label. The experiment procedure is the same as that shown in the assay procedure using probe 2. After the reaction is completely accomplished, we measure the fluorescence polarization value of the reaction solution upon addition of two different lengths of ssDNA (one is 6-base length FAM-ssDNA, the other is 19-base length probe 2), respectively. The results are displayed below in Fig. S4. It can be seen that the FP value of the solution with addition of 6-base length FAM-ssDNA (20 nM) is 70. However, the FP value of the solution with addition of 19-base length FAM-probe 2 (20 nM) is 350. Obviously, the short length ssDNA has weaker affinity to TiS<sub>2</sub> nanosheet compared with the long length ssDNA. This result confirms that the TiS<sub>2</sub> nanosheet

has enough adsorption sites for the ssDNA. Thus, the low fluorescence polarization value is not caused by incomplete adsorption of the fragments.

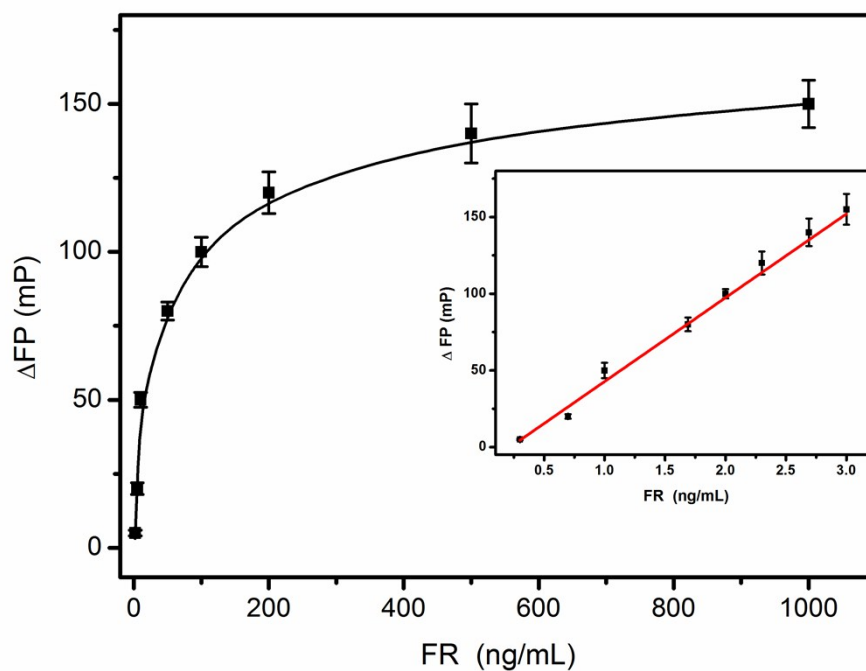

Fig. S5. Fluorescence polarization changes of probe 1 + probe 2 +  $\text{TiS}_2$  system upon addition of different concentrations of FR. Inset is the relationship of  $\Delta FP$  with the FR concentration. [Probe 1] = 48 nM, [probe 2] = 40 nM and [ $\text{TiS}_2$ ] = 35  $\mu\text{g/mL}$ . The error bar was calculated from three independent experiments.

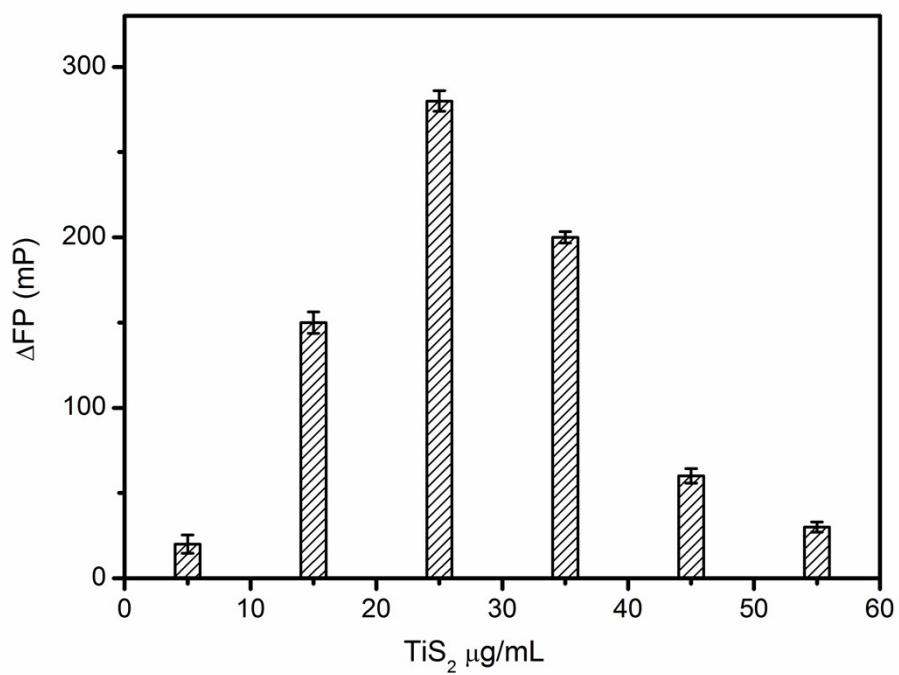

Fig. S6. The effect of  $\text{TiS}_2$  concentration on the  $\Delta FP$  response of the sensing system.  $\Delta FP = FP_0 - FP$ , where  $FP_0$  and  $FP$  are the fluorescence polarization in the absence and presence of Tb, respectively.  $[\text{probe 3}] = 30 \text{ nM}$ ,  $[\text{probe 2}] = 25 \text{ nM}$ ,  $[\text{Tb}] = 5 \text{ ng/mL}$ ,  $[\text{Zn}^{2+}] = 2 \text{ mM}$  and  $[\text{Exo I}] = 10 \text{ U}$ .

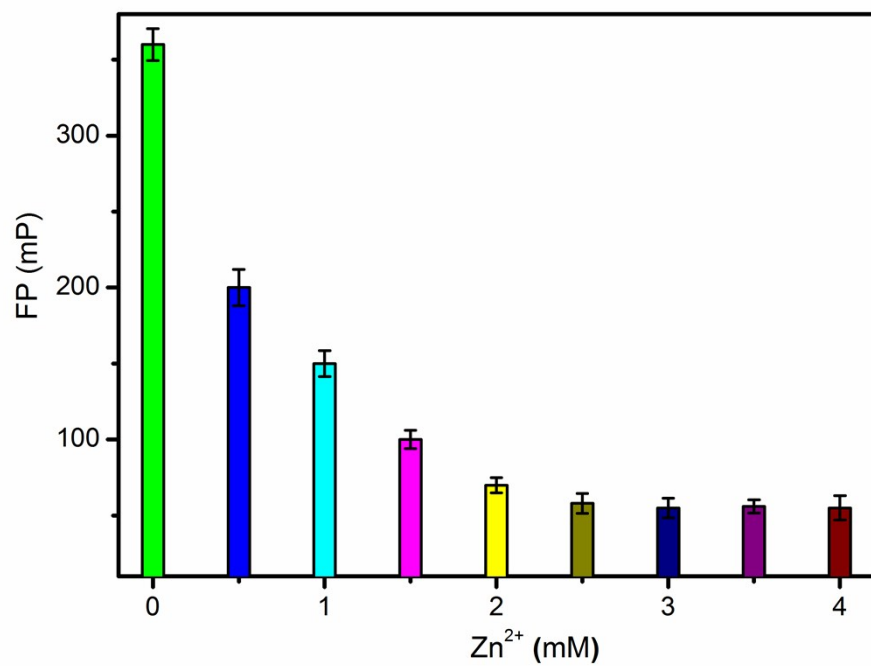

Fig. S7. The effect of Zn<sup>2+</sup> concentration on the fluorescence polarization of the detection system. [probe 3] = 30 nM, [probe 2] = 25 nM, [TiS<sub>2</sub>] = 25 μg/mL.

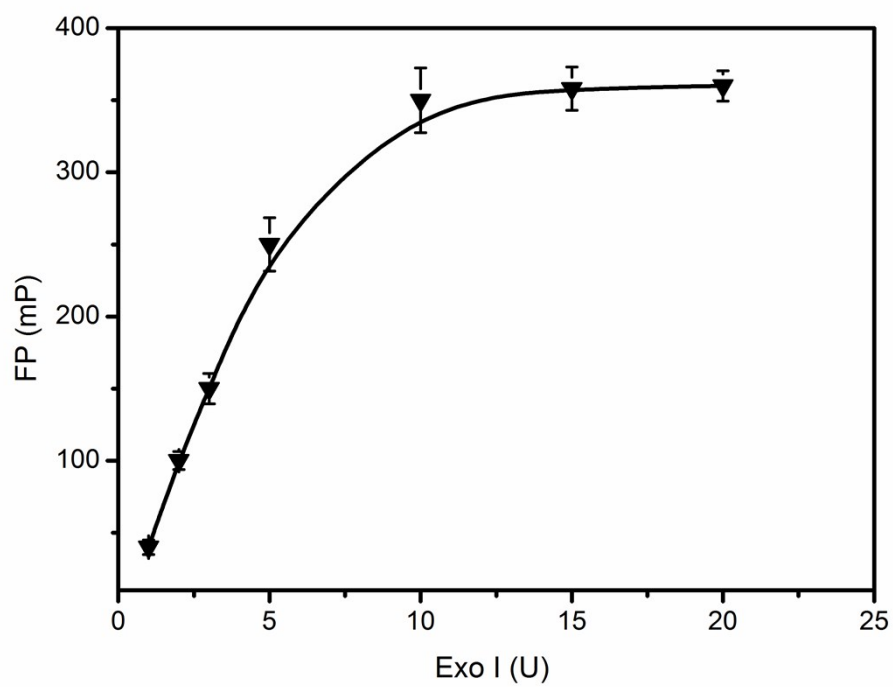

Fig. S8. The effect of Exo I concentration on the fluorescence polarization response of the sensing system. [probe 3] = 30 nM, [probe 2] = 25 nM, [TiS<sub>2</sub>] = 25 µg/mL, [Zn<sup>2+</sup>] = 2.0 mM.

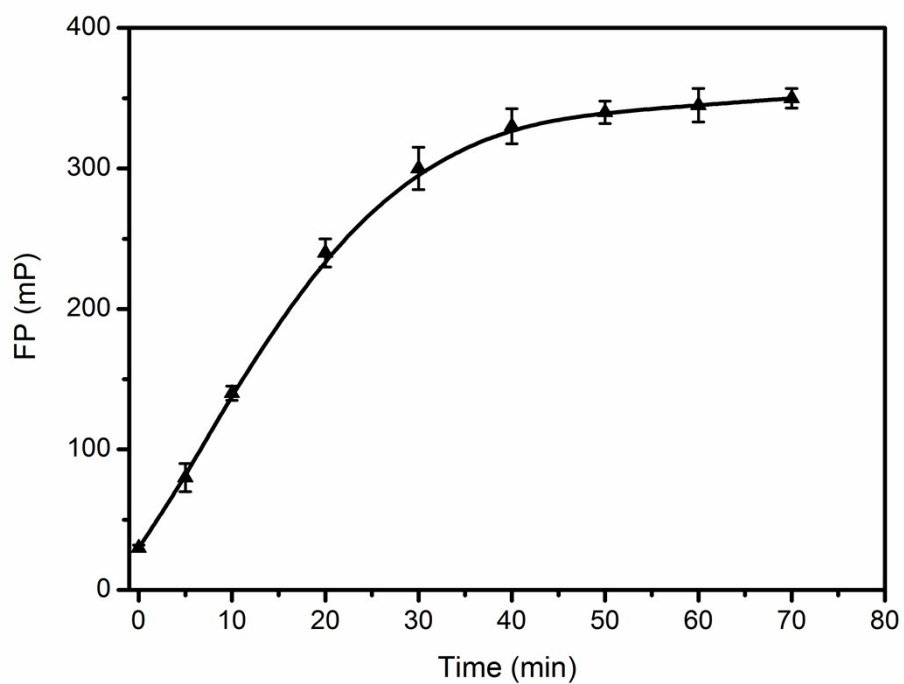

Fig. S9. The fluorescence polarization intensity of the sensing system as a function of the reaction time between probe 1 and Exo I. [probe 3] = 30 nM, [probe 2] = 25 nM, [TiS<sub>2</sub>] = 25 μg/mL, [Exo I] = 10 U, [Zn<sup>2+</sup>] = 2.0 mM.

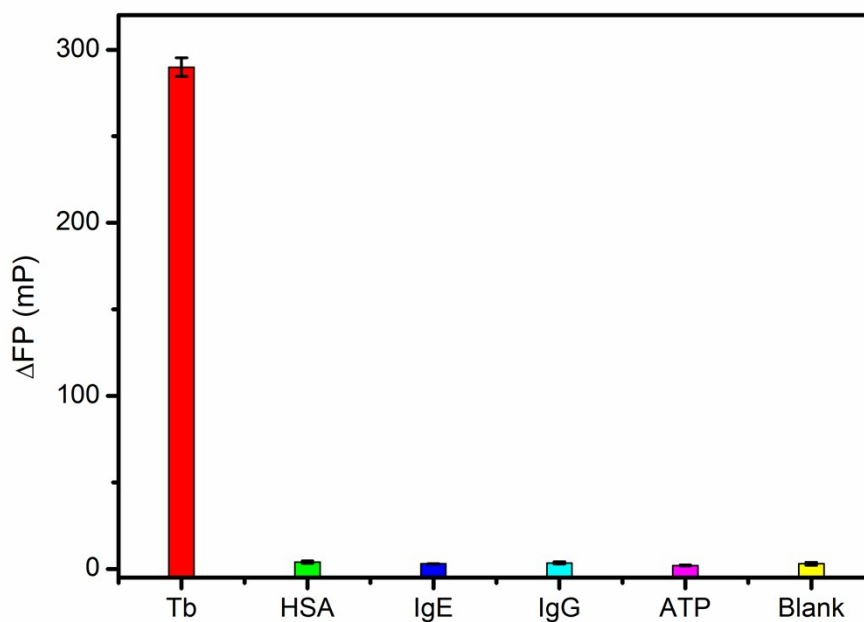

Fig. S10. Selectivity of the developed sensing system for Tb (1 nM) against the interfering molecules HSA, IgE, IgG and ATP at 1  $\mu$ M. The error bar was calculated from three independent experiments.

#### References:

- S1 G. F. Wang, X. P. He, L. Wang, X. J. Zhang, *Biosens. Bioelectron.*, **2013**, 42 337-341.
- S2 Y. Cao, S. Zhu, J. C. Yu, X. J. Zhu, Y. M. Yin, G. X. Li, *Anal. Chem.*, **2012**, 84, 4314-4320.
- S3 Z. Wu, Z. Zhen, J. H. Jiang, G. L. Shen, R. Q. Yu, *J. Am. Chem Soc.*, **2009**, 131, 12325-12332.
- S4 H. B. Wang, H. D. Zhang, S. P. Xu, T. Gan, K. J. Huang, Y. M. Liu, *Sensor. Actuat B-Chem.*, **2014**, 194, 478-483.
- S5 J. Zhao, S. S. Hu, Y. Cao, B. Zhang, G. X. Li, *Biosens. Bioelectron.*, **2015**, 66 327-331.
- S6 Y. H. Zhu, G. F. Wang, L. Sha, Y. W. Qiu, H. Jiang, X. J. Zhang, *Analyst*, **2015**, 140, 1260-1264.



- S7 X. Gong, W. J. Zhou, Y. Q. Chai, Y. Xiang, R. Yuan, *RSC Adv.*, **2015**, 5, 6100-6105.
- S8 X. J. Yang, Z. Q. Gao, *Nanoscale*, **2014**, 6, 3055-3058.
- S9 Y. He, X. J. Xing, H. W. Tang, D. W. Pang, *Small*, **2013**, 9, 2097-2101.
- S10 L. J. Ou, H. B. Wang, X. Chu, *Analyst*, **2013**, 138, 7218-7223.
- S11 F. Luo, L. Zheng, S. Chen, Q. Cai, Z. Lin, B. Qiu, G. Chen, *Chem. Commun.*, **2012**, 48, 6387-6389.
- S12 C. H. Lu, H. H. Yang, C. L. Zhu, X. Chen, G. N. Chen, *Angew. Chem. Int. Ed.*, **2009**, 48, 4785-4787.
- S13 R. Yang, Z. Tang, J. Yan, H. Kang, Y. Kim, Z. Zhu, W. H. Tan, *Anal. Chem.*, **2008**, 80, 7408-7413.
- S14 X. Liu, R. Freeman, I. Willner, *Chem. Eur. J.*, **2012**, 18, 2207-2211.
- S15 J. Ge, E. C. Ou, R. Q. Yu, X. Chu, *J. Mater. Chem. B*, **2014**, 2, 625-628.
- S16 L. Y. Xue, X. M. Zhou, D. Xing, *Anal. Chem.*, **2012**, 84, 3507-3513.
- S17 D. P. Zhang, Q. Zhao, B. L. Zhao, H. L. Wang, *Anal. Chem.*, **2012**, 84, 3070-3074.
- S18 Y. Huang, X. Liu, L. Zhang, K. Hu, S. Zhao, B. Fang, Z. F. Chen, H. Liang, *Biosensor. Bioelectron.*, **2015**, 63, 178-184.
